# Supplementary material for: Phylogenetic relationships and evolutionary history of the greater horseshoe bat, Rhinolophus ferrumequinum, in Northeast Asia
Source: PubMed Central journal article supplement (PMC5068396; doi:10.7717/peerj.2472), 2016-10-11

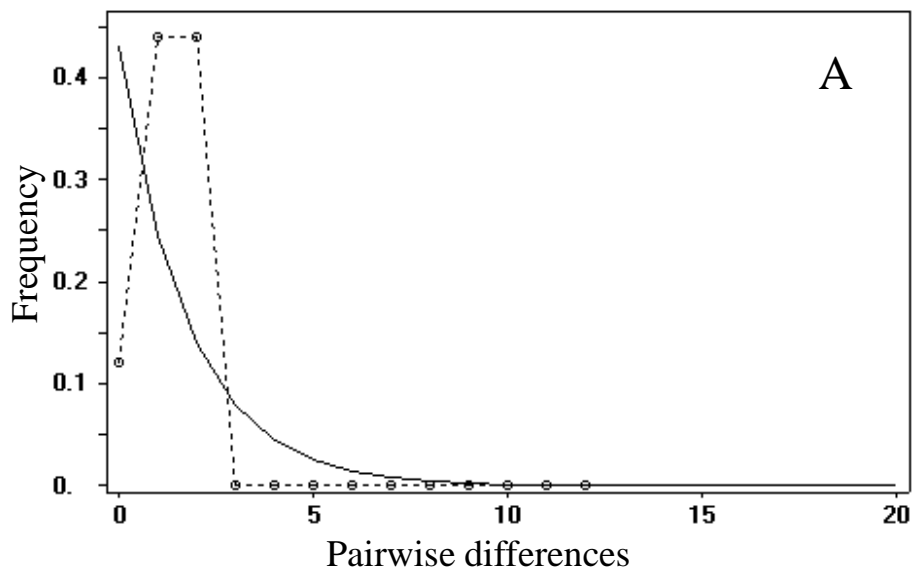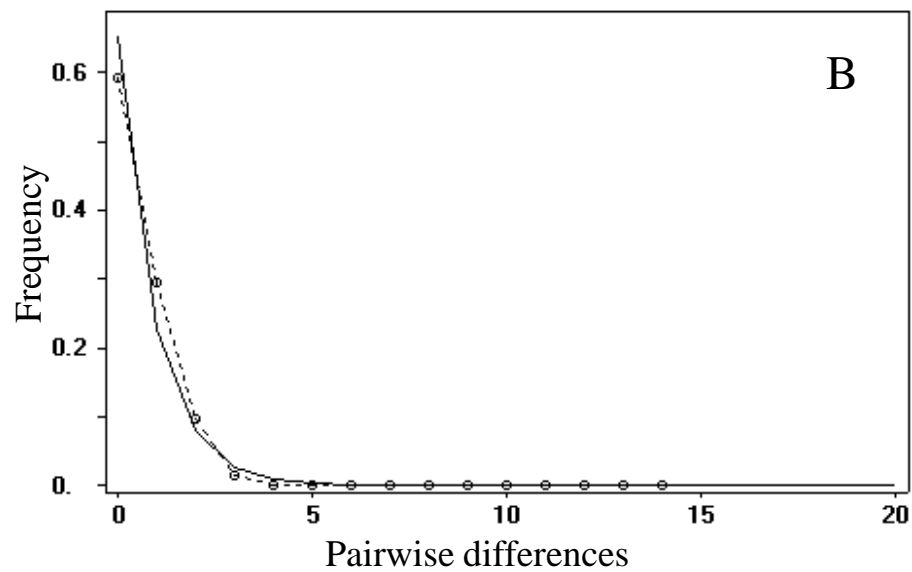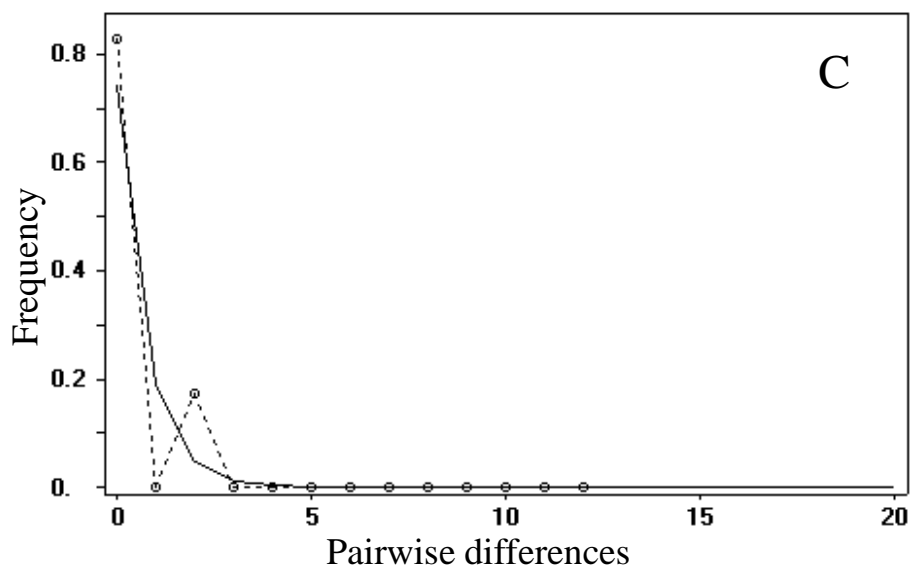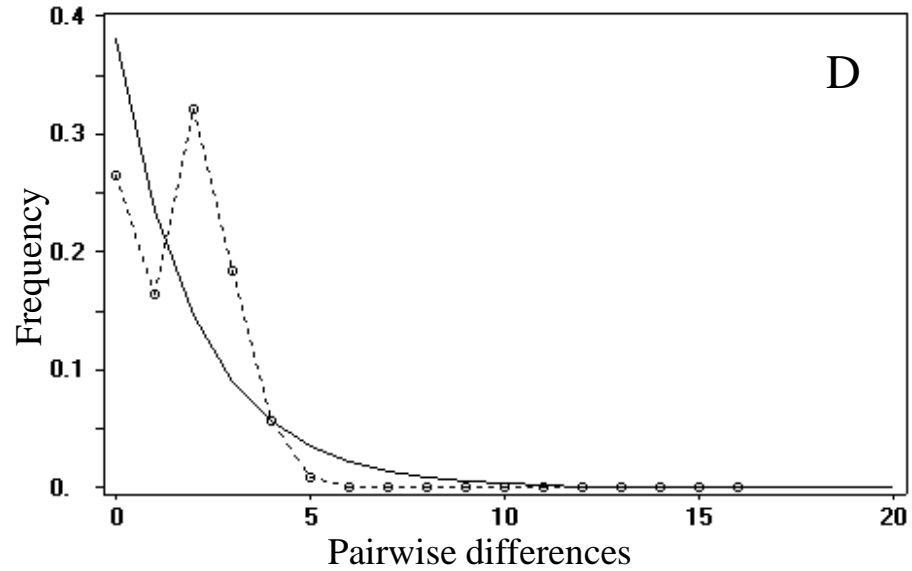

Supplement: peerj-04-2472-s001.pdf [file peerj-04-2472-s001.pdf]
